# Supplementary material for: Dye-sensitized polyoxometalate for visible-light-driven photoelectrochemical cells
Source: Royal Society of Chemistry journal article supplement (doi:10.1039/c5dt01769f), 2015-01-01
Supplement: c5dt01769f1.pdf [file c5dt01769f1.pdf]

## Supporting Information:

### Dye-sensitized polyoxometalate for visible-light-driven photoelectrochemical cells

Junkuo Gao,<sup>a,b</sup> Jianwei Miao,<sup>c</sup> Yongxin Li,<sup>d</sup> Rakesh Ganguly,<sup>d</sup> Yang Zhao,<sup>b</sup> Ovadia lev,<sup>e</sup> Bin Liu<sup>c</sup> and Qichun Zhang<sup>\*b,d</sup>

<sup>a</sup> The Key laboratory of Advanced Textile Materials and Manufacturing Technology of Ministry of Education, National Engineering Lab for Textile Fiber Materials and Processing Technology (Zhejiang), College of Materials and Textiles, Zhejiang Sci-Tech University, Hangzhou 310018, P. R. China.

<sup>b</sup> School of Materials Science and Engineering, Nanyang Technological University, Singapore 639798, Singapore; E-mail: qc Zhang@ntu.edu.sg

<sup>c</sup> School of Chemical and Biomedical Engineering, Nanyang Technological University, Singapore 637459, Singapore. E-mail: liubin@ntu.edu.sg

<sup>d</sup> School of Physical and Mathematical Sciences, Nanyang Technological University, Singapore 637371, Singapore

<sup>e</sup>The Casali Institute and the Institute of Chemistry and The Harvey M. Krueger Family Center for Nanoscience and Nanotechnology, The Hebrew University of Jerusalem, Edmond J. Safra Campus, Jerusalem 91904, Israel

## 1. Crystal data of MoBB3.

**Table S1.** Crystal data and structure refinement for **MoBB3**.

|                                   |                                                                                                    |
|-----------------------------------|----------------------------------------------------------------------------------------------------|
| Empirical formula                 | C <sub>40</sub> H <sub>52</sub> Mo <sub>6</sub> N <sub>6</sub> O <sub>21</sub>                     |
| Formula weight                    | 1528.52                                                                                            |
| Crystal system                    | Monoclinic                                                                                         |
| Space group                       | P2(1)/n                                                                                            |
| Unit cell dimensions              | a = 10.9209(6) Å    α = 90°<br>b = 19.2268(13) Å    β = 101.122(2)°<br>c = 11.9644(7) Å    γ = 90° |
| Volume                            | 2465.0(3) Å <sup>3</sup>                                                                           |
| Z                                 | 2                                                                                                  |
| Density (calculated)              | 2.059 Mg/m <sup>3</sup>                                                                            |
| Goodness of fit on F <sup>2</sup> | 1.024                                                                                              |
| Final R indices [I > 2σ(I)]       | R1 = 0.0256, wR2 = 0.0524                                                                          |
| R indices (all data)              | R1 = 0.0326, wR2 = 0.0548                                                                          |

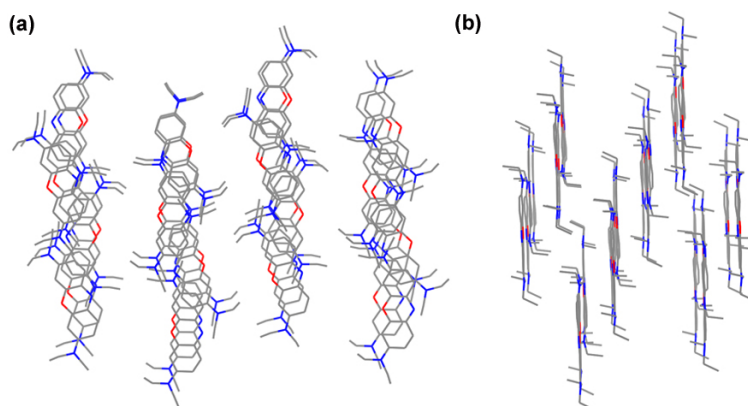

**Figure S1.** a) The alignment of dye cations in **MoBB3** along the z-axis. b) The alignment of dye cations in **MoBB3** along the y-axis.

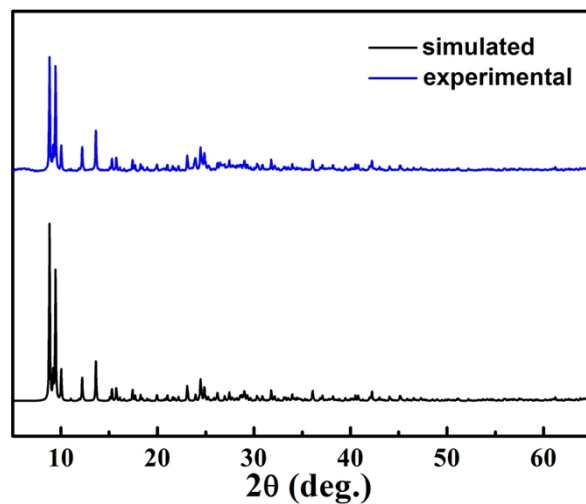

**Figure S2.** Simulated and experimental XRD patterns of **MoBB3**.

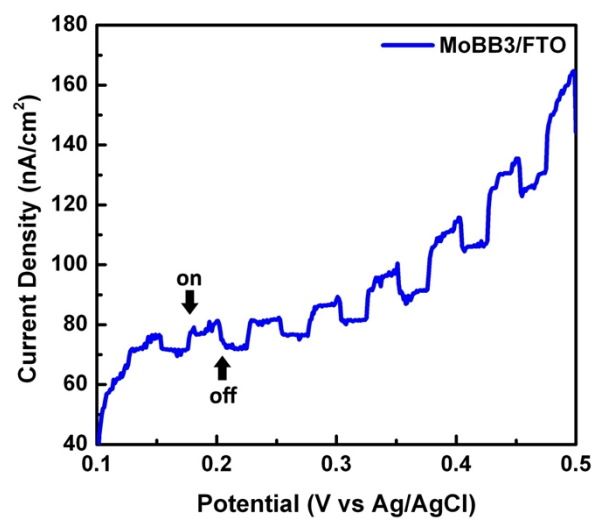

**Figure S3.** The photocurrent-voltage (J-V) behavior of **MoBB3/FTO** recorded using linear sweep voltammetry under chopped AM 1.5 G illumination.
